# Supplementary material for: Ficus carica Polysaccharides Promote the Maturation and Function of Dendritic Cells
Source: MDPI journal article supplement (doi:10.3390/ijms150712469), 2014-07-14

## Supplementary Information

**Figure S1.** FCPS promote the maturation of D2SC/1 cells. (A–D) D2SC/1 cells were stimulated with FCPS (100  $\mu\text{g/mL}$ ) for 24 h. Cells were stained with specific Abs against CD40 (A); CD80 (B); CD86 (C); and MHCII (D), and then analyzed via flow cytometry. The values shown in the histograms are geometric mean fluorescence intensities (GeoMFI). The data were representative of three independent experiments.

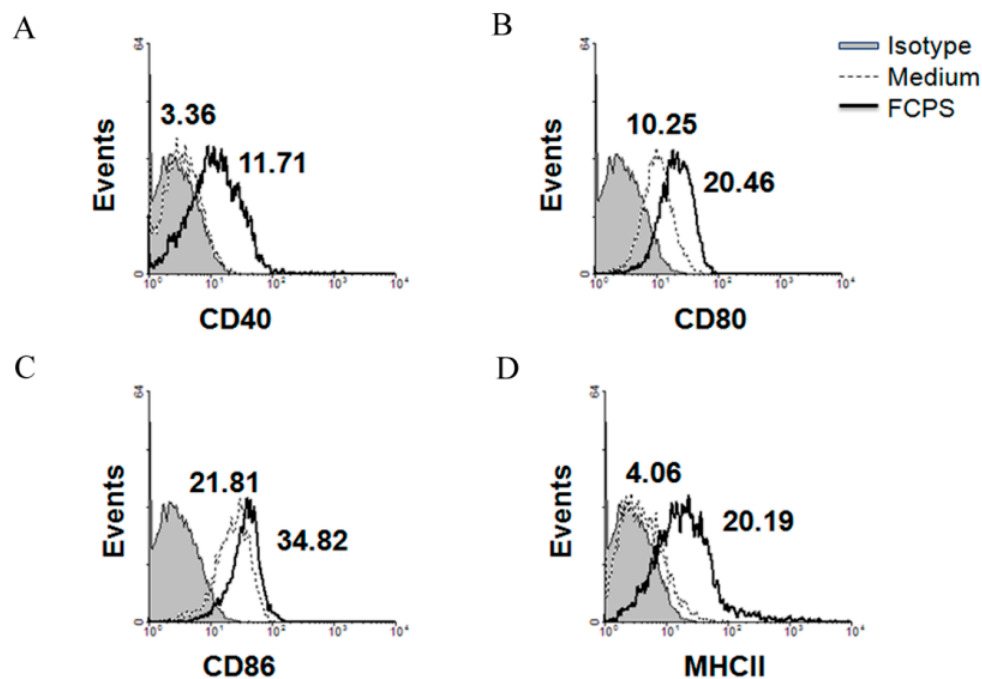

Supplement: s1 [file s1]
